# Supplementary material
Source: Royal Society of Chemistry journal article supplement (doi:10.1039/d6nj00887a)
Supplement: d6nj00887a1.pdf [file d6nj00887a1.pdf]

**Supporting Information**

**Ionic Liquid-based Low-dimensional Fluorosensor for Ultrasensitive Detection of Perchlorate ions in Aqueous Media**

Subekchha Pradhan, and Sudhir Kumar Das\*

Department of Chemistry, University of North Bengal, Raja Rammohunpur, Darjeeling, West Bengal-734013, India

Corresponding author: (Dr. S. K. Das; E-mail: [sudhirkumardas@nbu.ac.in](mailto:sudhirkumardas@nbu.ac.in))

**Table of contents**

| Sl. No.           | Descriptions                                                                                                                                                                                                                             | Page No. |
|-------------------|------------------------------------------------------------------------------------------------------------------------------------------------------------------------------------------------------------------------------------------|----------|
| <b>Figure. S1</b> | <sup>1</sup> H NMR spectrum (CDCl <sub>3</sub> , 400 MHz) of parent moiety, C.                                                                                                                                                           | 2        |
| <b>Figure. S2</b> | High-resolution mass spectra of the parent moiety, C.                                                                                                                                                                                    | 3        |
| <b>Figure S3</b>  | <sup>1</sup> H NMR spectrum (CDCl <sub>3</sub> , 400 MHz) of sodium salt, D.                                                                                                                                                             | 3        |
| <b>Figure. S4</b> | High-resolution mass spectra of the sodium salt of the parent moiety, D.                                                                                                                                                                 | 4        |
| <b>Figure. S5</b> | <sup>1</sup> H NMR spectrum (CDCl <sub>3</sub> , 400 MHz) of <b>APIL</b> .                                                                                                                                                               | 5        |
| <b>Figure. S6</b> | <sup>13</sup> C NMR spectrum (CDCl <sub>3</sub> , 100 MHz) of <b>APIL</b> .                                                                                                                                                              | 5        |
| <b>Figure. S7</b> | <sup>31</sup> P NMR spectrum (CDCl <sub>3</sub> , 400 MHz) of <b>APIL</b> .                                                                                                                                                              | 6        |
| <b>Figure S8</b>  | LCMS spectra of <b>APIL</b> ; <b>(A)</b> positive ion mode and <b>(B)</b> negative ion mode.                                                                                                                                             | 6-7      |
| <b>Figure S9</b>  | (a) Differential scanning calorimetry (DSC) thermogram of <b>APIL</b> . <b>(b)</b> Thermogravimetric analysis (TGA) thermogram of <b>APIL</b>                                                                                            | 8        |
| <b>Figure S10</b> | Zeta potential of the nano-GUMBOS, <b>APIL</b>                                                                                                                                                                                           | 8        |
| <b>Figure S11</b> | UV-visible absorption spectra of optode <b>APIL</b> in different percentages of water. <b>(b)</b> Fluorescence spectra of <b>APIL</b> in water-DMSO-D6 mixed solvents demonstrating ACQ.                                                 | 9        |
| <b>Figure S12</b> | (a) UV vis spectroscopy comparison of parent moiety and parent moiety on addition of ClO <sub>4</sub> <sup>-</sup> (b) Photoluminescence comparison of parent moiety and parent moiety upon addition of ClO <sub>4</sub> <sup>-</sup>    | 9        |
| <b>Figure S13</b> | (a) UV-visible absorption spectral comparison of sodium salt and sodium salt on addition of ClO <sub>4</sub> <sup>-</sup> (b) Photoluminescence comparison of sodium salt and sodium salt upon addition of ClO <sub>4</sub> <sup>-</sup> | 10       |
| <b>Figure S14</b> | Histogram displaying the selectivity of <b>mAPIL</b> (43 μM) with ClO <sub>4</sub> <sup>-</sup> over other metals (45 μM).                                                                                                               | 10       |
| <b>Figure S15</b> | <b>(a)</b> Fluorometric stability of <b>mAPIL</b> suspension. <b>(b)</b> Fluorometric response time of water-suspended <b>mAPIL</b> for the detection of ClO <sub>4</sub> <sup>-</sup> .                                                 | 11       |
| <b>Table S1</b>   | Solvatochromism comparison of the parent moiety, its sodium                                                                                                                                                                              | 11-12    |

|                   |                                                                                                                                                                    |       |
|-------------------|--------------------------------------------------------------------------------------------------------------------------------------------------------------------|-------|
|                   | salt, and ionic liquid                                                                                                                                             |       |
| <b>Table S2</b>   | Calculated $\Delta G$ values at various temperatures                                                                                                               | 12    |
| <b>Table S3</b>   | Determination of $\text{ClO}_4^-$ ions in various water samples.                                                                                                   | 12    |
| <b>Figure S16</b> | Influence of pH on the photoluminescence behavior of <b>mAPIL</b> in the absence and presence of $\text{ClO}_4^-$ ions.                                            | 13    |
| <b>Table S4</b>   | Comparison table of different chemosensors that have been introduced for detecting $\text{ClO}_4^-$ ions in the last few decades, with our prepared <b>mAPIL</b> . | 13-14 |

---

## S1 Experimental section

### S1.1. Synthetic procedures and characterizations.

**Compound C:** Imidazole derivative compound **c** was synthesized via a multistep procedure. 9, 10-Phenanthrenequinone (**a**) (150 mg) was dissolved in glacial acetic acid (AcOH) and reacted with ammonium acetate at 90 °C for 30 min, followed by the addition of anthracene-9-carbaldehyde (**b**) (200 mg, 1 equiv). The mixture was refluxed at 110 °C for 90 min, yielding yellow powder imidazole derivative (**c**) upon precipitation in ice water (78% yield after medium-pressure liquid chromatography (MPLC) purification, 15% EtOAc/petroleum ether). **<sup>1</sup>H NMR** (400 MHz,  $\text{CDCl}_3$ )  $\delta$  8.957- 8.94 (m, 3H), 8.601 (d, 1H), 8.392 (d, 1H). 8.257 (d, 2H), 7.815 (d, 2H), 7.722 (m, 4H), 7.616 (t, 2H), 7.546 ( t, 2H ), 13.9 (s, 1H, NH). HRMS calculated for  $\text{C}_{29}\text{H}_{18}\text{N}_2$ : 394.47, found: 395.15 (m/z).

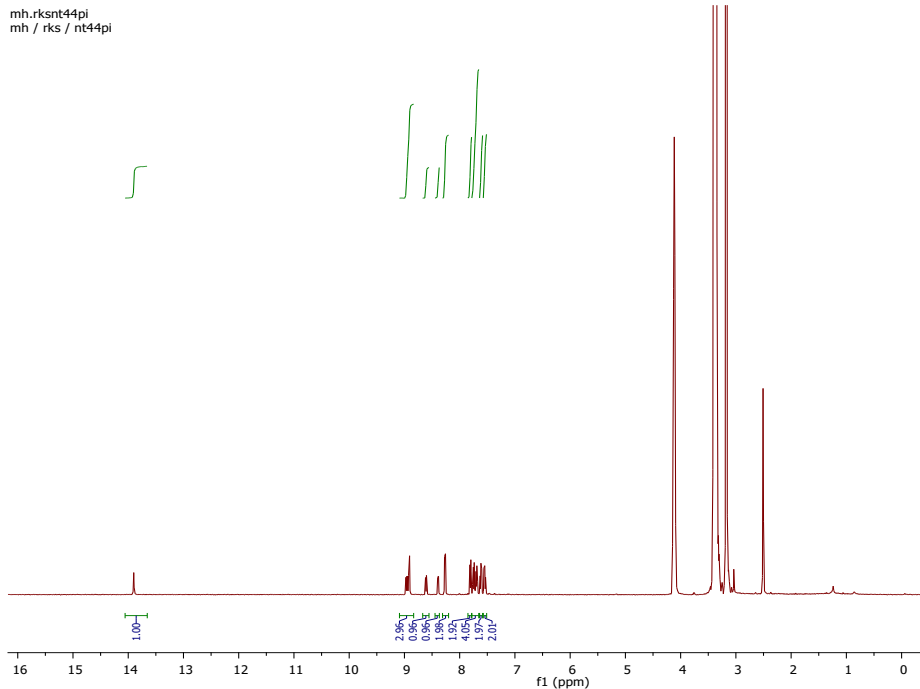

**Figure S1:**  $^1\text{H}$  NMR spectrum ( $\text{CDCl}_3$ , 400 MHz) of parent moiety, C.

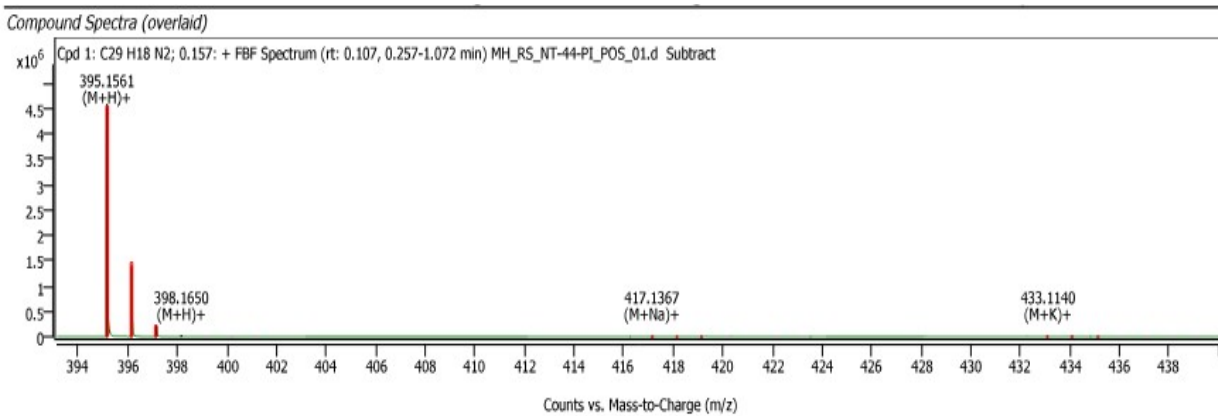

**Figure S2:** High-resolution mass spectra of parent moiety, C.

**Compound D:** Compound c was treated with NaOH in methanol, stirred for 6 h, and evaporated to afford Sodium salt intermediate D.  $^1\text{H}$  NMR (400 MHz,  $\text{CDCl}_3$ )  $\delta$  7.707-7.671 ( m, 5H), 7.375-7.346 ( m, 4H), 6.286 ( d, 2H), 6.185 (s, 2H), 6.082 (s, 4H). HRMS calculated for  $\text{C}_{29}\text{H}_{17}\text{N}_2\text{Na}$ : 416.47, found: 417.13 (m/z).

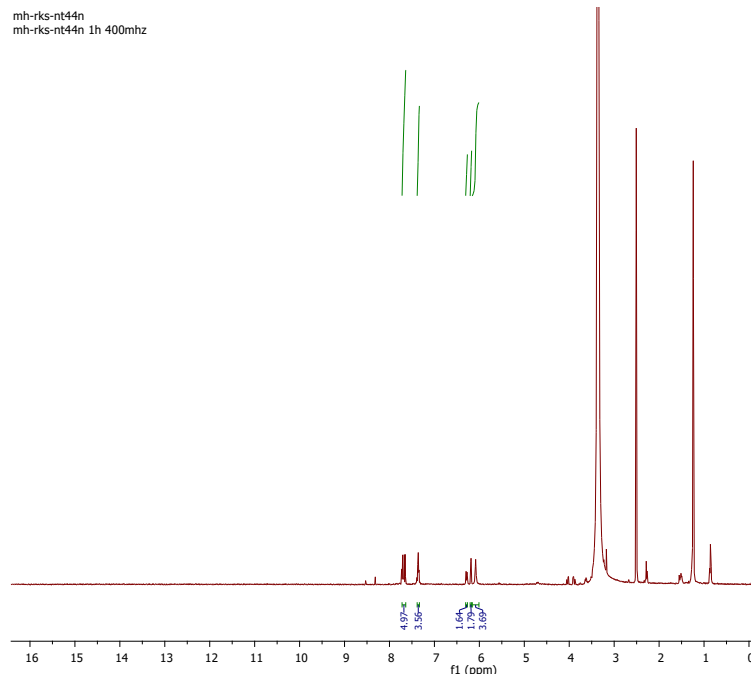

**Figure S3:**  $^1\text{H}$  NMR spectrum ( $\text{CDCl}_3$ , 400 MHz) of sodium salt, D.

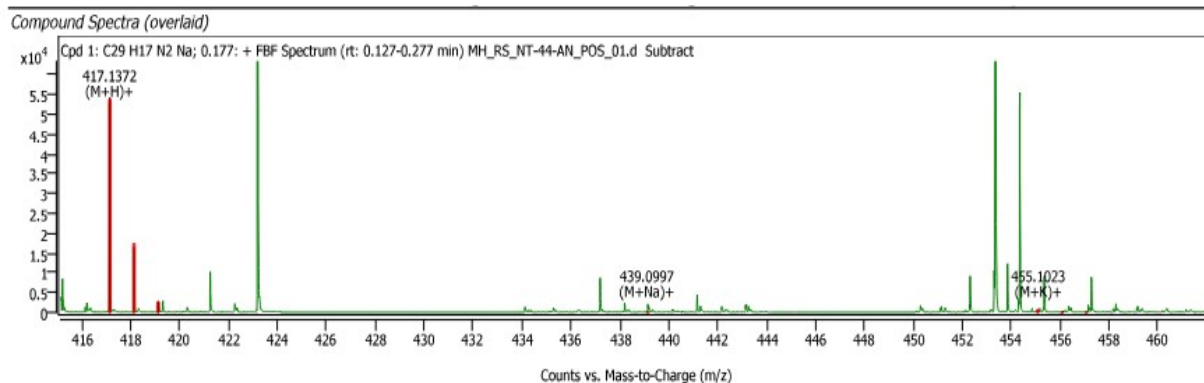

**Figure S4:** High-resolution mass spectra of the sodium salt of the parent moiety, D.

**Ionic Liquid (APIL):** APIL was synthesized following a literature method with slight modifications<sup>1</sup>. Succinctly, in a dichloromethane (DCM)-water mixture of 2:1(v/v), the sodium salt D and the ionic liquid  $\text{P}_{66614}\text{Cl}$  in a 1:1 molar ratio were stirred overnight, resulting in an ion exchange process. The solvent phase was purged, and repeated washing of the DCM layer with water was performed to remove the  $\text{NaCl}$  byproduct, which was confirmed by adding  $\text{AgNO}_3$

solution and washing the reaction mixture multiple times until no white precipitate of AgCl formed. To eliminate the trace water in the DCM layer containing APIL, it was passed through anhydrous Na<sub>2</sub>SO<sub>4</sub>. **APIL** was obtained (SCHEME 1) by evaporating the DCM and residual water under vacuum at 60°C for 2 hours <sup>1</sup>H NMR (400 MHz, DMSO, δ(ppm)):7.684(s,1H), 7.564-7.479 (m,3H), 7.708 (m,4H), 7.892-7.777 (q,2H), 8.062-7.892 (m,2H), 8.294-8.136 (m,2H), 8.501-5.324 (d,1H), 8.880-8.693 (m,1H), 8.991-8.896 (m,1H), 2.183-2.178 (m,19H), 1.387-1.381 (m,20H), 0.866-0.8605 (m,21H) <sup>13</sup>C NMR (100 MHz, CDCl<sub>3</sub>, δ (ppm)): 199.11, 198.42, 196.33 ,196.02, 194.98, 193.76,192.78, 191.95, 191.16, 173.46, 162.22 ,160.90, 159.54, 148.72, 140.37, 140.09, 139.19, 137.84, 128.84, 122.35, 121.51, 118.39, 111.86, 110.86, 106.39, 102.78, 101.88 ,99.78, 93.55 71.62, 69.76, 67.68, 67.41, 66.68, 66.07, 65.95, 65.4, 63.10, 57.45, 57.40, 56.61, 55.81, 54.96, 53.34, 32.84, 31.75, 31.47, 31.33, 29.15, 23.13, 22.55, 21.44, 14.42, 8.25, 4.53, 4.06, 2.47, 1.58, 0.18, 0.93. <sup>31</sup>P NMR (400 MHz, CDCl<sub>3</sub>, δ (ppm): 34.9

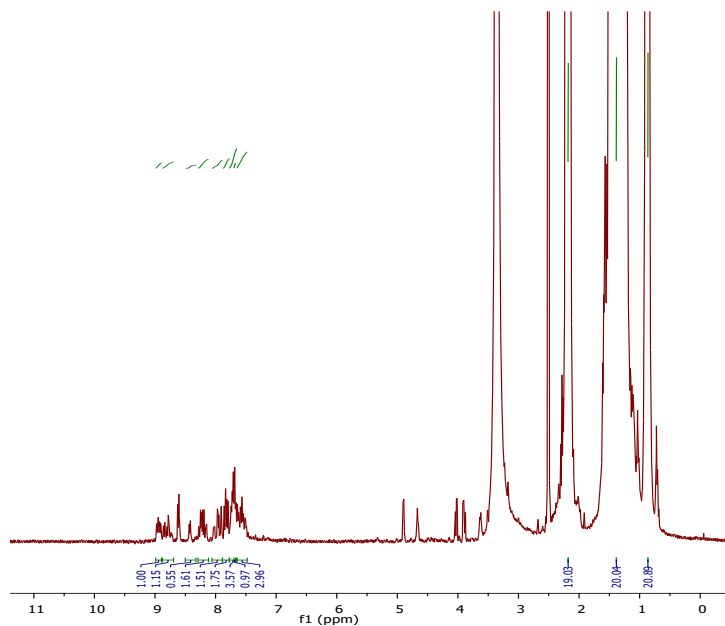

**Figure. S5:** <sup>1</sup>H NMR spectrum (CDCl<sub>3</sub>, 400 MHz) of **APIL**.

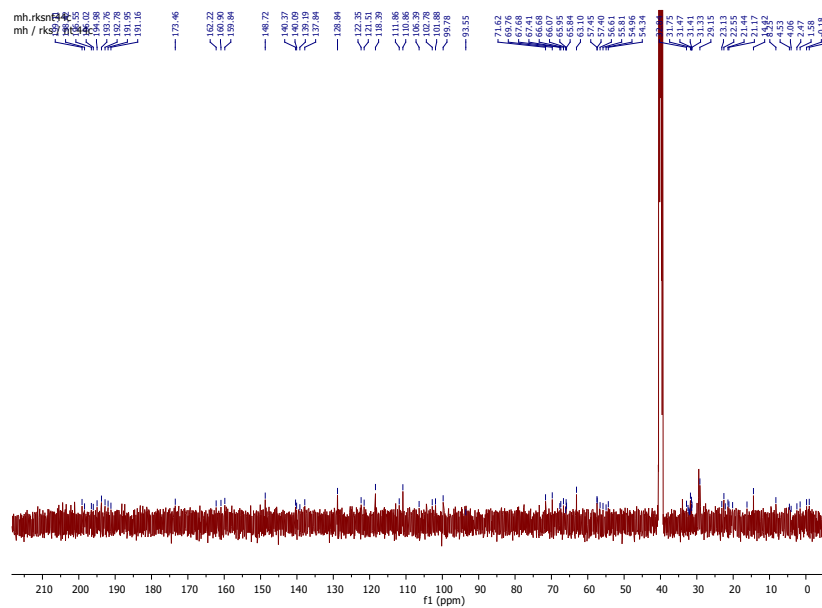

**Figure. S6:**  $^{13}\text{C}$  NMR spectrum ( $\text{CDCl}_3$ , 100 MHz) of APIL.

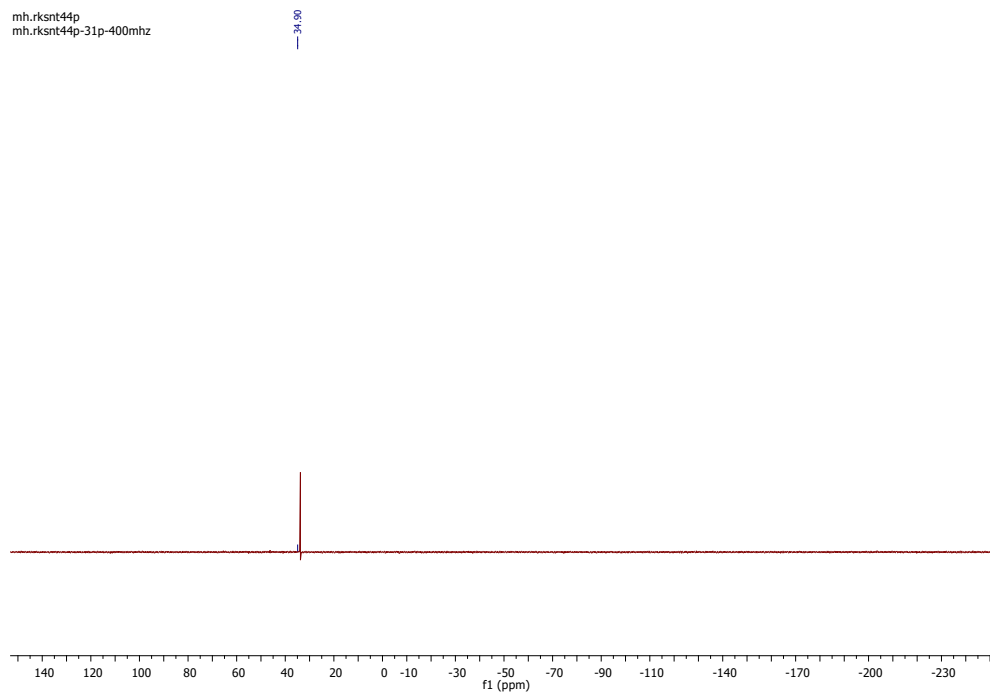

**Figure. S7:**  $^{31}\text{P}$  NMR spectrum ( $\text{CDCl}_3$ , 400 MHz) of APIL.

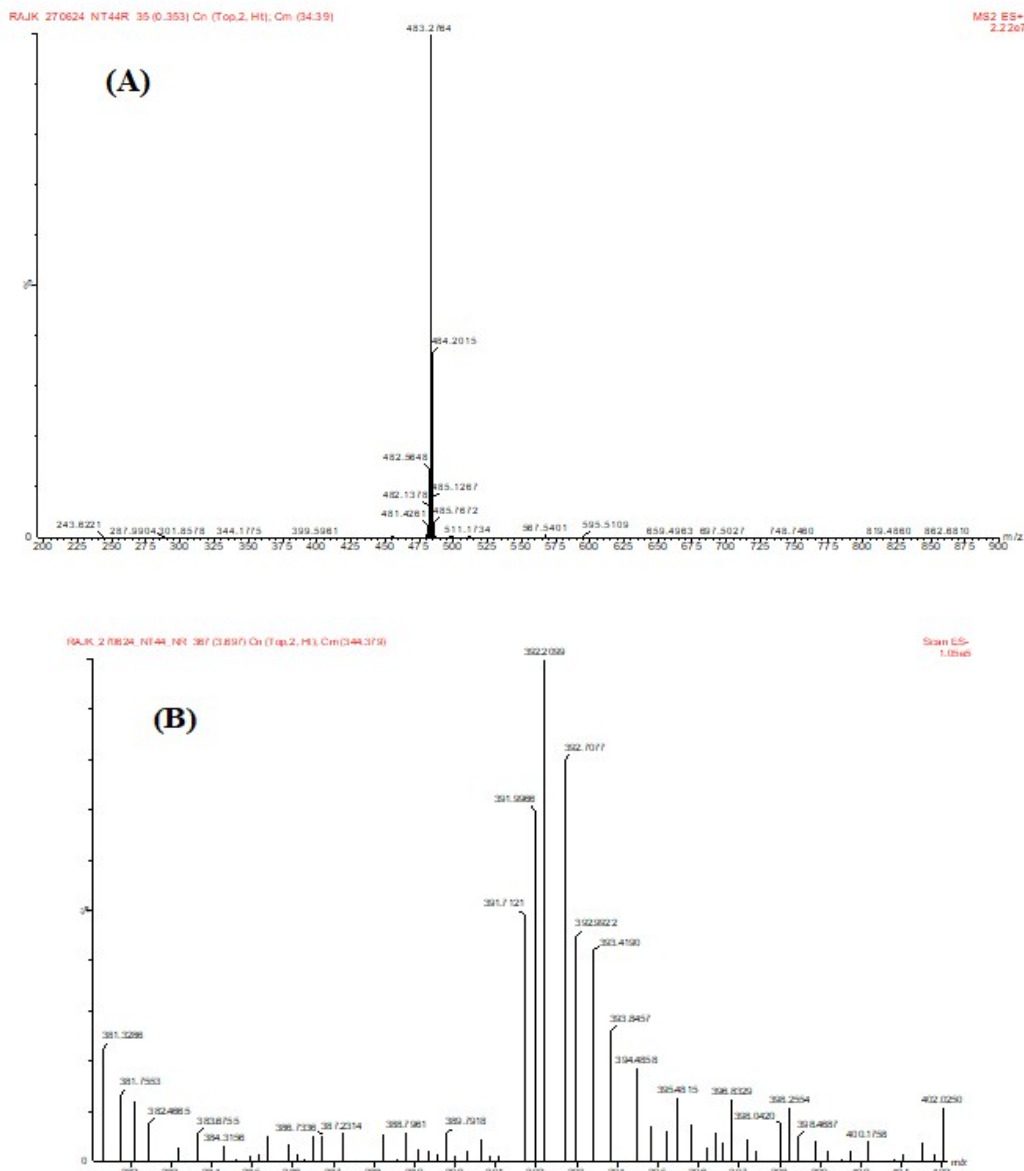

**Figure. S8:** LCMS spectra of APIL; (A) positive ion mode and (B) negative ion mode.

### S1.2. Estimation of Quantum Yield

For the determination of the fluorescence quantum yield ( $\Phi_x$ ) of **mAPIL** in DMSO, and to investigate the aggregation-caused quenching (ACQ) mechanism by increasing the water fraction, quinine sulfate in 0.1 N  $\text{H}_2\text{SO}_4$  ( $\Phi = 0.55$ )<sup>2</sup> was used as the standard.

$$\Phi = \Phi_c \left( \frac{F_s}{F_c} \right) \left( \frac{A_c}{A_s} \right) \left( \frac{\eta_s^2}{\eta_c^2} \right)$$

In the applied formula,  $\Phi$  indicates quantum yield,  $F$  is the integrated fluorescence emission,  $A$  is absorbance, and  $\eta$  is the refractive index of the solvent. The subscripts "c" and "s" denote the standard and the sample (APIL in DMSO / mAPIL / mAPIL - ClO<sub>4</sub><sup>-</sup>), respectively. Based on this analysis, the quantum yields of APIL in DMSO, mAPIL, and its ClO<sub>4</sub><sup>-</sup> complex were found.

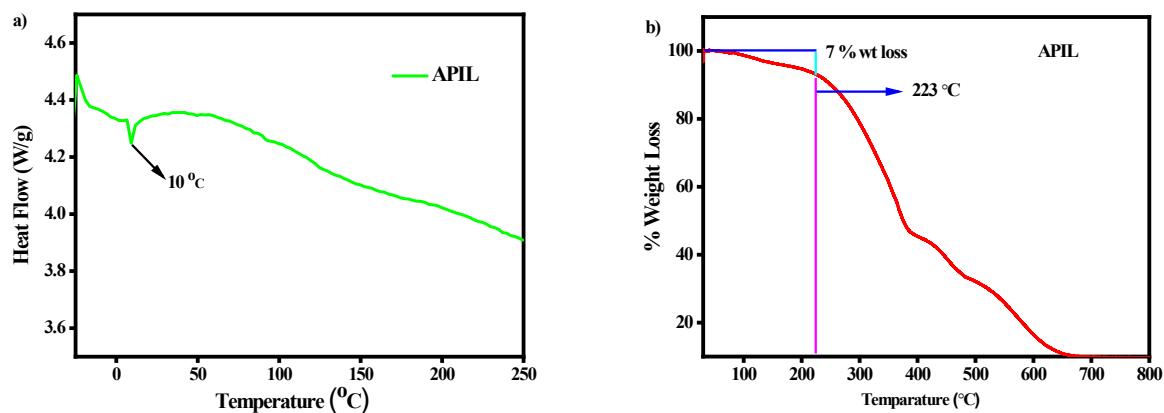

**Figure S9:** (a) Differential scanning calorimetry (DSC) thermogram of APIL. (b) Thermogravimetric analysis (TGA) thermogram of APIL

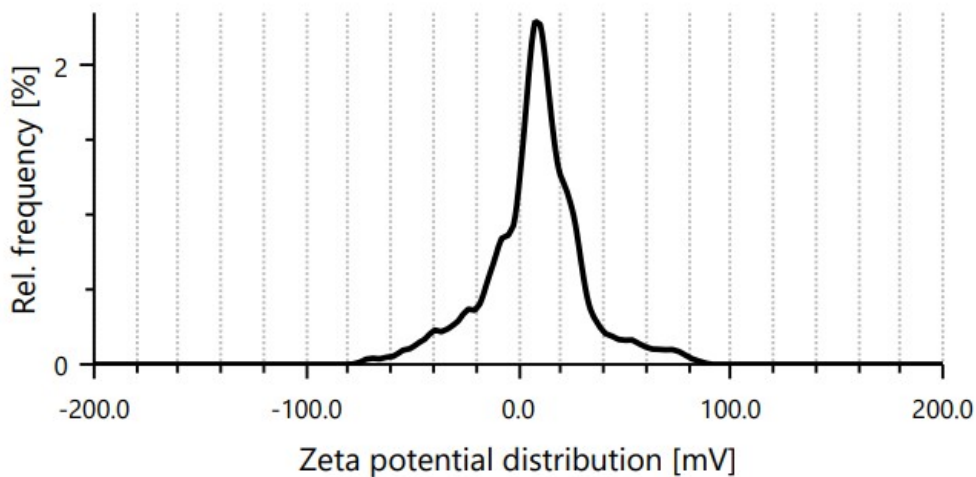

**Figure S10:** Zeta potential of the mAPIL solution.

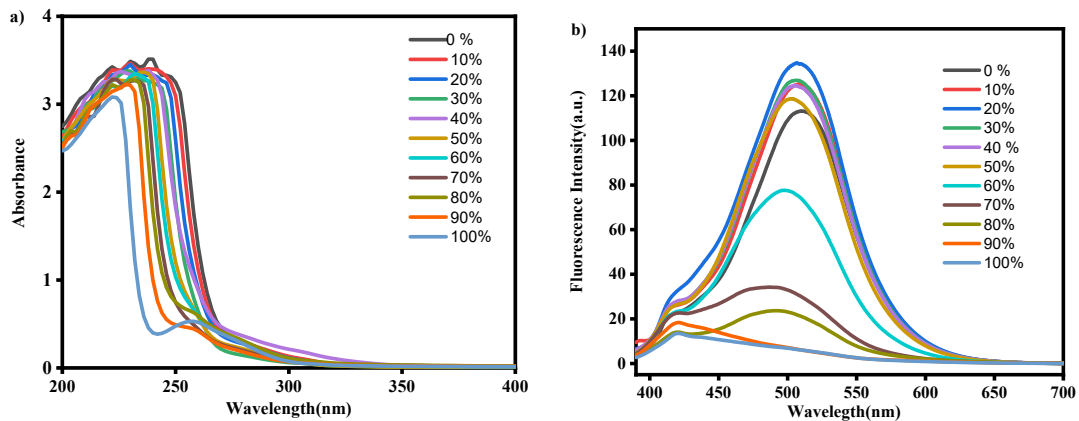

**Figure. S11** (a)UV-visible absorption spectra of optode **APIL** in different percentages of water. (b) Fluorescence spectra of **APIL** in water-DMSO mixed solvents demonstrating ACQ.

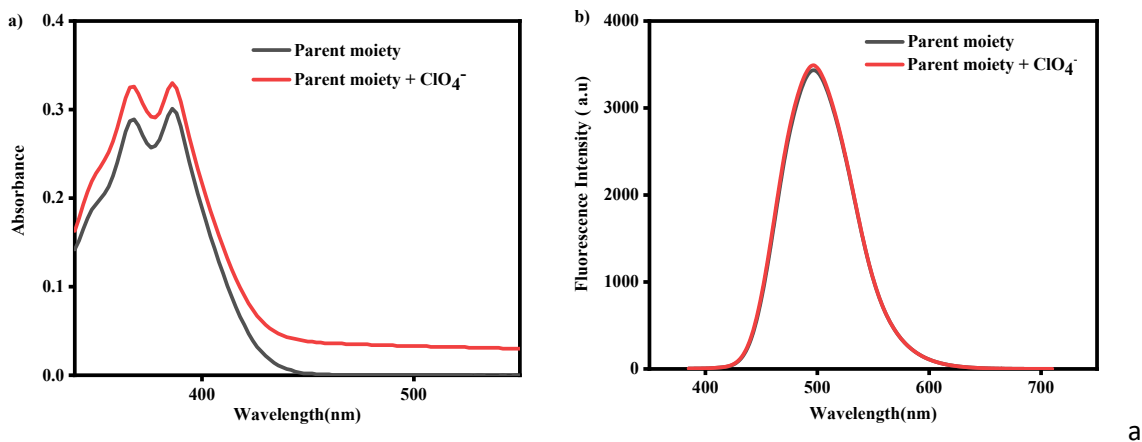

**Figure S12:** (a)UV vis spectroscopy comparison of parent moiety and parent moiety on addition of  $\text{ClO}_4^-$  (b) Photoluminescence comparison of parent moiety and parent moiety upon addition of  $\text{ClO}_4^-$

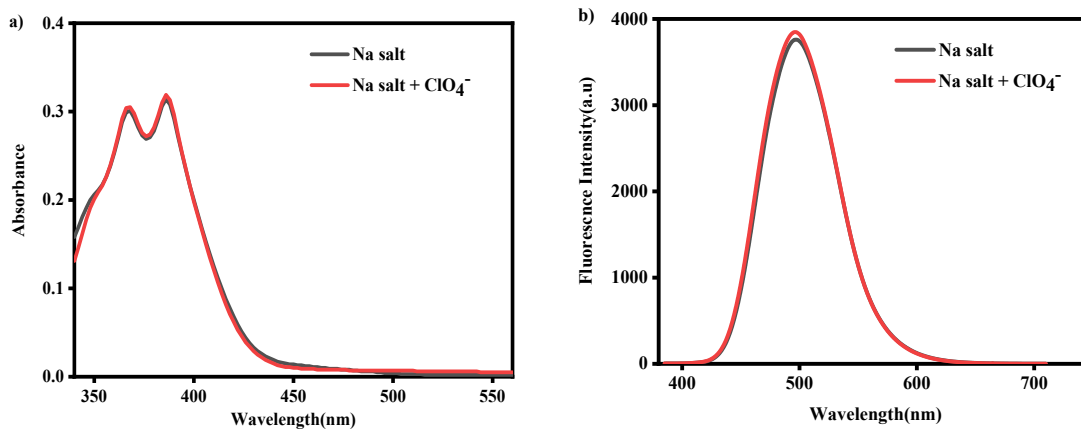

**Figure S13:** (a) UV-visible spectral comparison of sodium salt and sodium salt on the addition of ClO<sub>4</sub><sup>-</sup> ions. (b) Photoluminescence comparison of sodium salt and sodium salt upon addition of ClO<sub>4</sub><sup>-</sup>

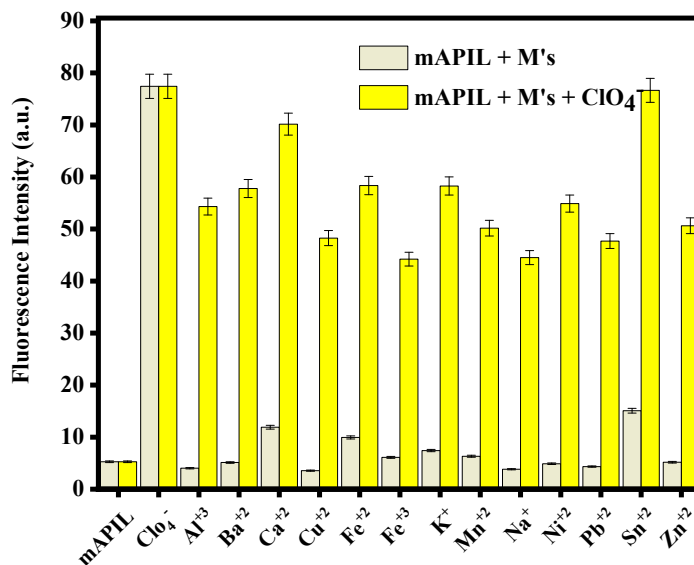

**Figure S14:** Histogram displaying the selectivity of mAPIL (43 μM) with ClO<sub>4</sub><sup>-</sup> ions over other metals (45 μM).

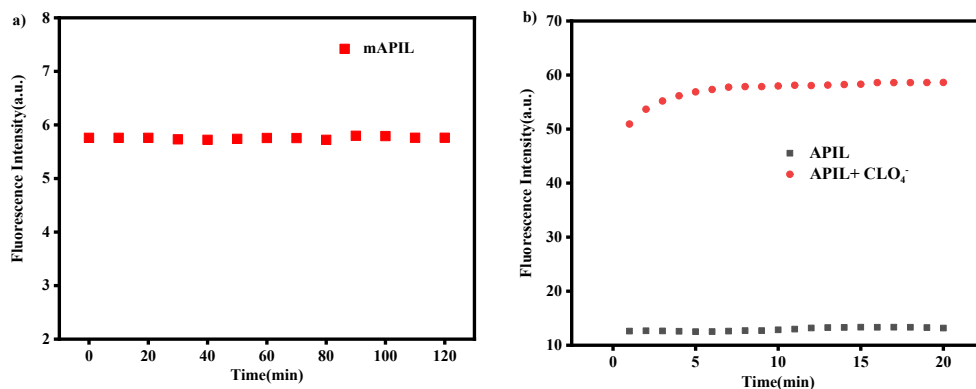

**Figure S15:** (a) Fluorometric stability of **mAPIL** suspension. (b) Fluorometric response time of water-suspended **mAPIL** for the detection of  $\text{ClO}_4^-$  ions.

**Table S1: Solvatochromism comparison of the parent moiety, its sodium salt, and ionic liquid**

|                      |                |               |               |
|----------------------|----------------|---------------|---------------|
| <b>Parent Moiety</b> | <b>Solvent</b> | <b>UV(nm)</b> | <b>FL(nm)</b> |
|                      | <b>THF</b>     | <b>384</b>    | <b>487.8</b>  |
|                      | <b>DCM</b>     | <b>386</b>    | <b>492.4</b>  |
|                      | <b>DMF</b>     | <b>387</b>    | <b>494.6</b>  |
|                      | <b>DMSO</b>    | <b>388</b>    | <b>496.2</b>  |
|                      | <b>WATER</b>   | <b>390</b>    | <b>490.4</b>  |
| <b>Sodium Salt</b>   | <b>Solvent</b> | <b>UV</b>     | <b>FL</b>     |
|                      | <b>THF</b>     | <b>306</b>    | <b>487.6</b>  |
|                      | <b>DCM</b>     | <b>366</b>    | <b>493.4</b>  |
|                      | <b>DMF</b>     | <b>386</b>    | <b>495.6</b>  |
|                      | <b>DMSO</b>    | <b>388</b>    | <b>496.4</b>  |
|                      | <b>WATER</b>   | <b>392</b>    | <b>491</b>    |
| <b>APIL</b>          | <b>Solvent</b> | <b>UV</b>     | <b>FL</b>     |
|                      | <b>THF</b>     | <b>264.43</b> | <b>498.6</b>  |

|             |              |              |               |
|-------------|--------------|--------------|---------------|
| <b>APIL</b> | <b>DCM</b>   | <b>276</b>   | <b>500</b>    |
|             | <b>DMF</b>   | <b>280</b>   | <b>502</b>    |
|             | <b>DMSO</b>  | <b>284</b>   | <b>508.61</b> |
|             | <b>WATER</b> | <b>294.5</b> | <b>421.6</b>  |

**Table S2:** Calculated  $\Delta G$  values at various temperatures.

| <b>Temperature(°C)</b> | <b><math>\Delta G</math> (Jmol<sup>-1</sup>)</b> | <b><math>\Delta H</math> (Jmol<sup>-1</sup>)</b> | <b><math>\Delta S</math> (Jmol<sup>-1</sup> K<sup>-1</sup>)</b> |
|------------------------|--------------------------------------------------|--------------------------------------------------|-----------------------------------------------------------------|
| 15                     | -22926.64                                        | -21732.54                                        | 79.61                                                           |
| 25                     | -23722.71                                        |                                                  |                                                                 |
| 35                     | -24518.77                                        |                                                  |                                                                 |
| 45                     | -25314.83                                        |                                                  |                                                                 |
| 55                     | -26110.9                                         |                                                  |                                                                 |
| 65                     | -26906.96                                        |                                                  |                                                                 |

**Table S3:** Determination of ClO<sub>4</sub><sup>-</sup> ions in various water samples.

| <b>Sample</b>            | <b>Added (μM)</b> | <b>Found (μM)</b> | <b>Recovery (%)</b> |
|--------------------------|-------------------|-------------------|---------------------|
| <b>River water</b>       | 7.29              | 7.23              | 99.09               |
|                          | 9.7               | 9.5               | 97.85               |
|                          | 12.1              | 11.94             | 98.68               |
|                          | 14.49             | 14.45             | 99.70               |
|                          | 16.86             | 16.56             | 98.19               |
|                          | 19.23             | 18.9              | 98.50               |
|                          | 21.5              | 21.40             | 99.17               |
| <b>Municipalitywater</b> | 12.1              | 11.8              | 98.12               |
|                          | 14.49             | 14.28             | 98.55               |
|                          | 19.23             | 18.9              | 98.3                |
|                          | 21.58             | 21.54             | 99.83               |
|                          | 23.92             | 23.72             | 99.18               |
|                          | 26.25             | 26.17             | 99.69               |
|                          | 28.57             | 28.40             | 99.42               |

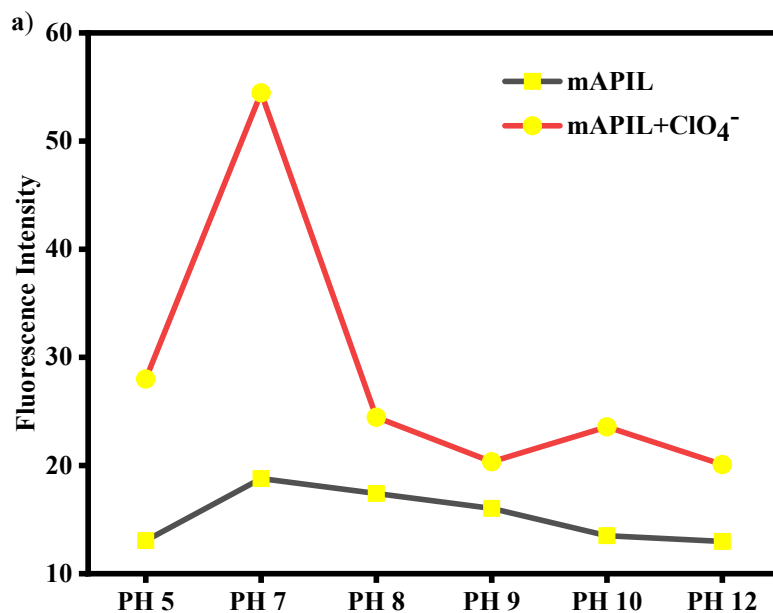

**Figure S16:** Influence of pH on the photoluminescence behavior of **mAPIL** in the absence and presence of  $\text{ClO}_4^-$  ions.

**Table S4:** Comparison table of different chemosensors that have been introduced for detecting  $\text{ClO}_4^-$  ion in the last few decades, with our prepared **mAPIL**

| Structure                                          | Medium                                                  | Optical signaling                   | LOD                  | Ref. No. |
|----------------------------------------------------|---------------------------------------------------------|-------------------------------------|----------------------|----------|
| Methylene Blue–Modified gold nanoparticles         | Ultrapure water                                         | Colorimetric                        | 24 $\mu\text{M}$     | 3        |
| [Pt(terpy)Br]-PVA hydrogel sensor                  | acetic acid/water/ethanol (0.5:1:1, v/v) mixed solution | turn-on luminescence                | 25 nM                | 4        |
| 1-(4-Biphenyl)benzimidazolium based dipodal system | HEPES buffer (0.01 M)                                   | quenching of fluorescence intensity | 100 nM               | 5        |
| Ion-selective electrodes                           | water                                                   | -                                   | 10 <sup>-7.4</sup> M | 6        |

---

|                                                                                                   |                                                                    |                                              |                       |    |  |
|---------------------------------------------------------------------------------------------------|--------------------------------------------------------------------|----------------------------------------------|-----------------------|----|--|
| using multi-walled carbon nanotubes as ion-to-electron transducers                                |                                                                    |                                              |                       |    |  |
| 1-(2-(3', 6'-bis(diethylamino)-3-oxospiro[isoinoline-1,9'-xanthene]-2-yl)ethyl)thiourea           | HEPES buffer (0.1 M in CH <sub>3</sub> CN/water, 4/1, v/v, pH 7.4) | colorimetric and fluorimetric                | $1 \times 10^{-7}$ M. | 7  |  |
| perylene diimide based chemosensor                                                                | HEPES buffer (10% DMSO) (v/v) (pH 7.4)                             | fluorescence quenching                       | 60 nM                 | 8  |  |
| Benzoimidazole-based                                                                              | HEPES buffer – 2% DMSO, pH 7.4                                     | fluorescence based                           | 1.6 $\mu$ M           | 9  |  |
| CHEMFET devices based on plasticized PVC membranes containing the phosphadithiamacrocycle.        | -                                                                  | Potentiometrically                           | $3 \times 10^{-7}$ M  | 10 |  |
| ISE devices based on plasticized PVC membranes containing the phosphadithiamacrocycle.            | -                                                                  | Potentiometrically                           | $8 \times 10^{-7}$ M  | 10 |  |
| gold–silica composite nanoparticle substrates for perchlorate                                     | -                                                                  | surface-enhanced Raman spectroscopy          | $10^{-6}$ M           | 11 |  |
| Novel polymeric membrane (PME) electrodes based on a phosphorous(V)-tetraphenylporphyrin complex. | Acetonitrile                                                       | UV-Vis, Fluorescence, and Potentiometrically | 5 $\mu$ M             | 12 |  |

---

|                                                                                                |              |                                               |                |                  |
|------------------------------------------------------------------------------------------------|--------------|-----------------------------------------------|----------------|------------------|
| Coated glassy carbon (CGCE) electrodes based on a phosphorous(V)-tetraphenylporphyrin complex. | Acetonitrile | UV-Vis, Fluorescence, and Potentiometrically. | 0.7 $\mu$ M    | 12               |
| <b>Anthracene phenantroimidazolate-based ionic liquid</b>                                      | <b>Water</b> | <b>fluorometric</b>                           | <b>12.7 nM</b> | <b>This work</b> |

- 1 W. I. S. Galpothdeniya, K. S. McCarter, S. L. De Rooy, B. P. Regmi, S. Das, F. Hasan, A. Tagge en I. M. Warner, *RSC Adv.*, 2014, **4**, 7225–7234.
- 2 J. Drobnik en E. Yeagers, *J. Mol. Spectrosc.*, 1966, **19**, 454–455.
- 3 B. Keskin, A. Üzer en R. Apak, *Talanta*, 2020, **206**, 120240.
- 4 Z. Su, Y. Li, J. Li en X. Dou, *Sensors Actuators B Chem.*, 2021, **336**, 129728.
- 5 R. Kumar, S. Kumar, P. Singh, G. Hundal, M. S. Hundal en S. Kumar, *Analyst*, 2012, **137**, 4913–4916.
- 6 E. J. Parra, G. A. Crespo, J. Riu, A. Ruiz en F. X. Rius, *Analyst*, 2009, **134**, 1905–1910.
- 7 A. Sahana, A. Banerjee, S. Lohar, A. Chottapadhyay, S. K. Mukhopadhyay en D. Das, *RSC Adv.*, 2013, **3**, 14044–14047.
- 8 P. Singh, L. S. Mittal, V. Vanita, R. Kumar, G. Bhargava, A. Walia en S. Kumar, *Chem. Commun.*, 2014, **50**, 13994–13997.
- 9 R. Kumar, S. Sandhu, P. Singh en S. Kumar, *J. Mater. Chem. C*, 2016, **4**, 7420–7429.
- 10 J. Casabó, L. Escriche, C. Pérez-Jiménez, J. A. Muñoz, F. Teixidor, J. Bausells en A.

- Errachid, *Anal. Chim. Acta*, 1996, **320**, 63–68.
- 11 W. Wang, C. Ruan en B. Gu, *Anal. Chim. Acta*, 2006, **567**, 121–126.
- 12 M. Shamsipur, A. Soleymanpour, M. Akhond, H. Sharghi en A. R. Hasaninejad, *Sensors Actuators B: Chem.*, 2003, **89**, 9–14.
